# Supplementary material for: Drought Sensitivity of the Carbon Isotope Composition of Leaf Dark-Respired CO2 in C3 (Leymus chinensis) and C4 (Chloris virgata and Hemarthria altissima) Grasses in Northeast China
Source: PubMed Central journal article supplement (PMC5770615; doi:10.3389/fpls.2017.01996), 2017-12-05

## Schematic drawing:

**a.** Putting syringe plunger out of the syringe and placing the leaves inside syringe (about 20 ml).

**b.** Connecting device interfaces:

Syringe with sample (② connect with ①)

Other syringe (no syringe plunger) with soda-lime and (③ connect with ①)

syringe needle (④ connect with ⑤)

**c.** Flushing the syringe barrel:

② communicate with ③ and seal ⑤, ③ connect with other syringe with soda-lime, flushed with CO<sub>2</sub>-free air 5 times by actuating the syringe plunger

**d.** Collecting leaf dark-respired CO<sub>2</sub>:

② communicate with ④ and ⑤ communicate with ⑥, CO<sub>2</sub> in the gas sample bag. CO<sub>2</sub> concentration in the gas sample bag is greater than 2000 ppm.

**e.** Backing to LAB and measuring CO<sub>2</sub> by an Isotope mass spectrometer

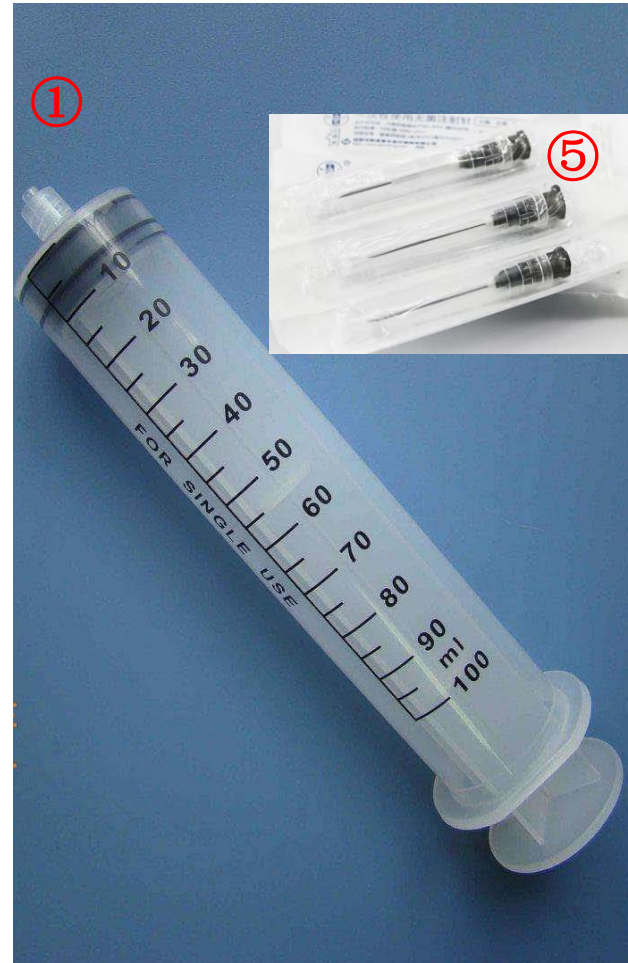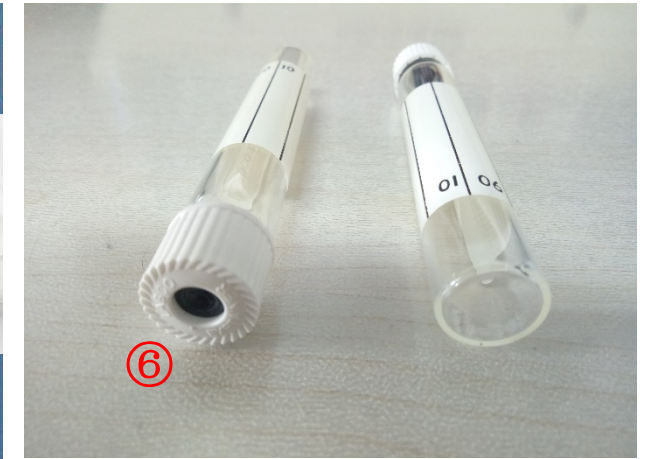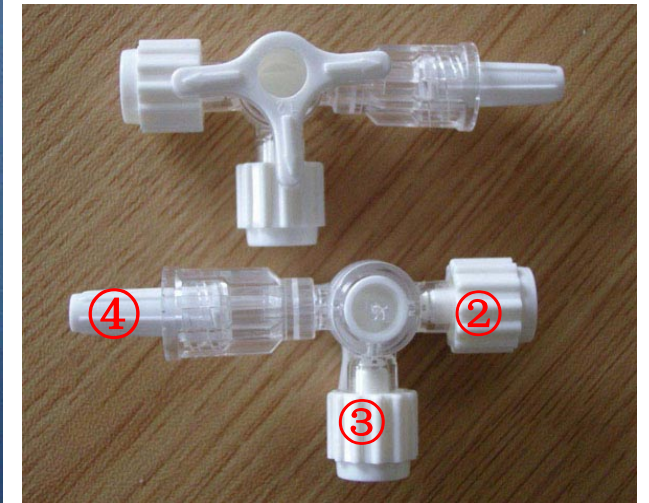

A. Air sampling equipment

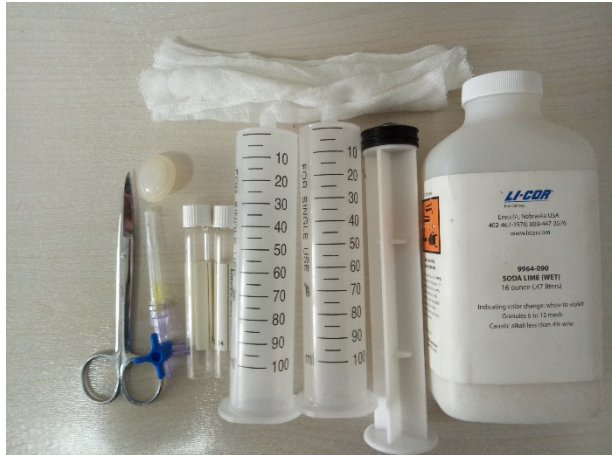

B. Putting the leaves into the syringe

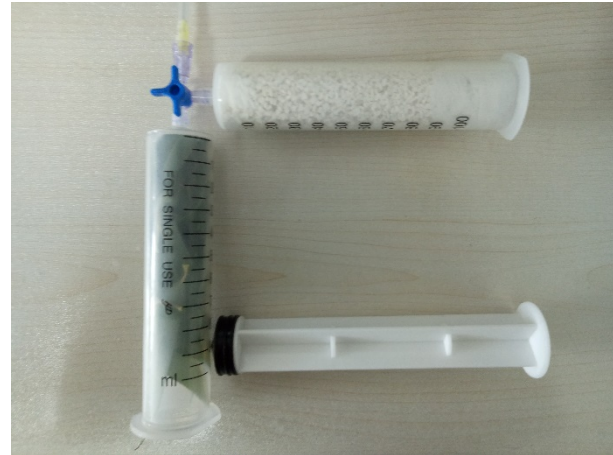

C. Flushing the syringe barrel

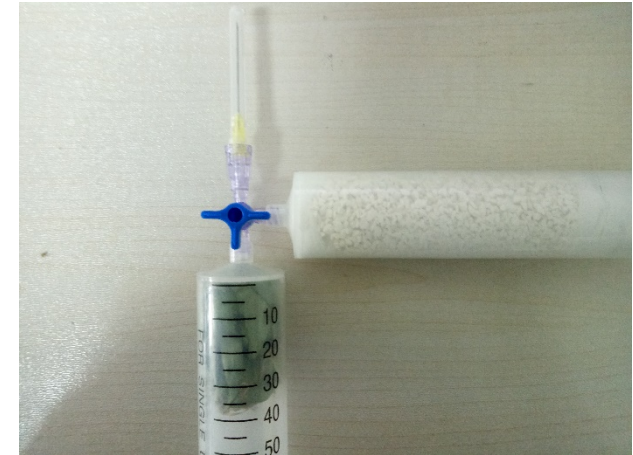

D. Accumulating CO<sub>2</sub> in the syringe barrel

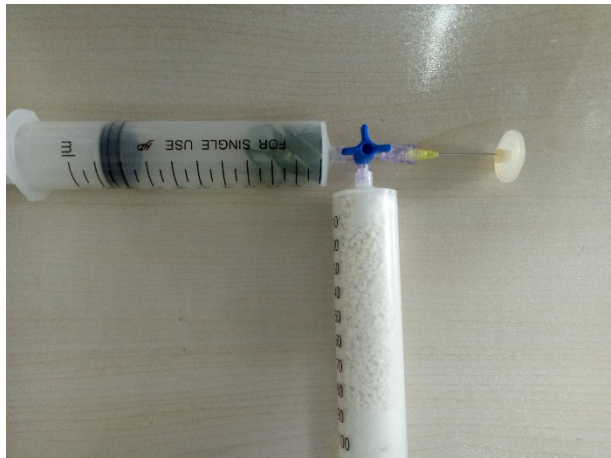

E. Collecting leaf dark-respired CO<sub>2</sub>

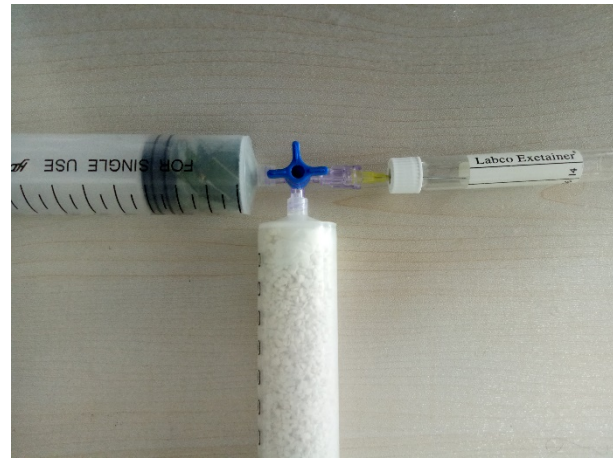

F. Backing to LAB and measuring CO<sub>2</sub>

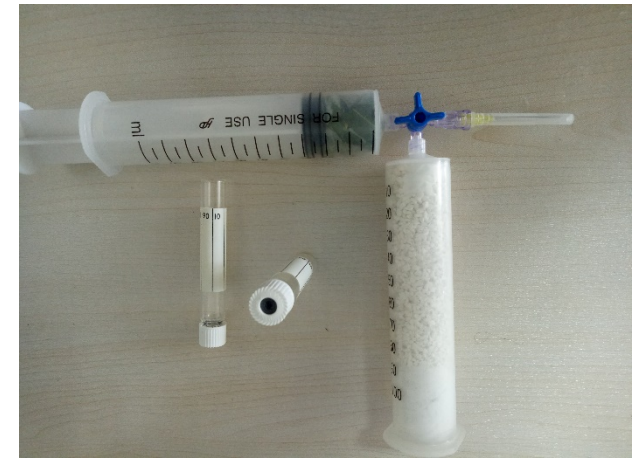

Supplement: Presentation1.pdf [file Presentation1.pdf]
